# Supplementary material for: Growing topography due to contrasting rock types in a tectonically dead landscape
Source: Copernicus journal article supplement (doi:10.5194/esurf-9-167-2021), 2021-03-09
Supplement: Supplementary file 1 [file esurf-9-167-2021-supplement.zip]

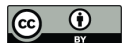

*Supplement of*

## **Growing topography due to contrasting rock types in a tectonically dead landscape**

**Daniel Peifer et al.**

*Correspondence to:* Daniel Peifer (peiferdaniel@gmail.com)

- esurf-9-167-2021-supplement-title-page.pdf
- Supplementary\_Table\_S1.xlsx
- Supplementary\_figures.pdf

The copyright of individual parts of the supplement might differ from the CC BY 4.0 License.
