# Supplementary material for: Growing topography due to contrasting rock types in a tectonically dead landscape
Source: Copernicus journal article supplement (doi:10.5194/esurf-9-167-2021), 2021-03-09
Supplement: Supplementary file 2 [file esurf-9-167-2021-supplement.zip]

# Growing topography due to contrasting rock types in a tectonically dead landscape

Daniel Peifer<sup>1,2</sup>, Cristina Persano<sup>1</sup>, Martin D. Hurst<sup>1</sup>, Paul Bishop<sup>1</sup>, Derek Fabel<sup>3</sup>

<sup>1</sup>School of Geographical and Earth Sciences, University of Glasgow, Glasgow, G12 8QQ, UK

5 <sup>2</sup>CAPES Foundation, Ministry of Education of Brazil, Brasilia - DF 70040-020, Brazil

<sup>3</sup>Scottish Universities Environmental Research Centre, East Kilbride, G75 0QF, UK

*Correspondence to:* Daniel Peifer (peiferdaniel@gmail.com)

## 1 Contents

### Supplementary Figures:

- 10                    **Figure S1.** Spatial distribution of Cenozoic units in the QF, excluding iron duricrusts.
- Figure S2.** Comparison between the drainage network used in this study and Brazil’s National Water Agency (ANA) drainage network based on topographic maps developed using aerophotogrammetry.
- Figure S3.** Bivariate regressions between catchment-averaged mean slope angle and local relief (A, B, C), and catchment-averaged normalised channel steepness and local relief (D, E, F).
- 15                    **Figure S4.** Bivariate regressions between catchment-averaged elevation and mean annual precipitation rates.
- Figure S5.** Log-linear correlations between basin area and denudation rates (panel A), and basin area and geomorphic parameters (panels B-D).
- Figure S6.** Variations in catchment-averaged denudation rates with mean normalised channel steepness for individual rock types.
- 20                    **Figure S7.** Scatter plot between catchment-averaged fluvial erosion efficiency coefficient ( $K$ ) against mean annual precipitation rates.

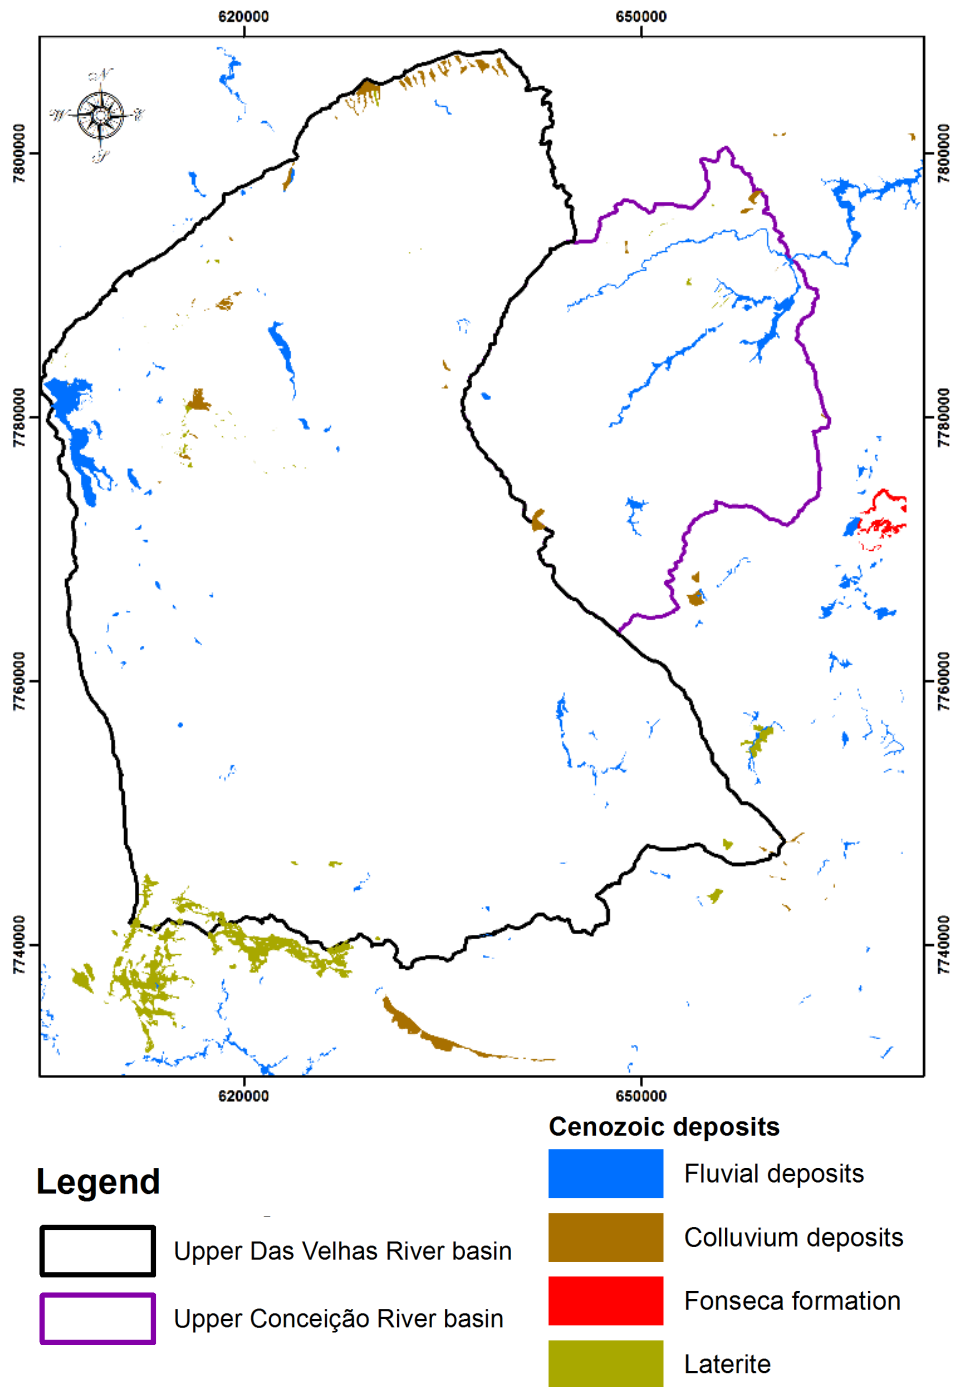

**Figure S1: Spatial distribution of Cenozoic units in the QF, excluding iron duricrusts.** Geological data: Lobato et al., 2005. The Fonseca formation refers to Eocene clayey and sandy lacustrine deposits often interpreted as tectonically controlled (e.g., Sant'anna et al., 1997).



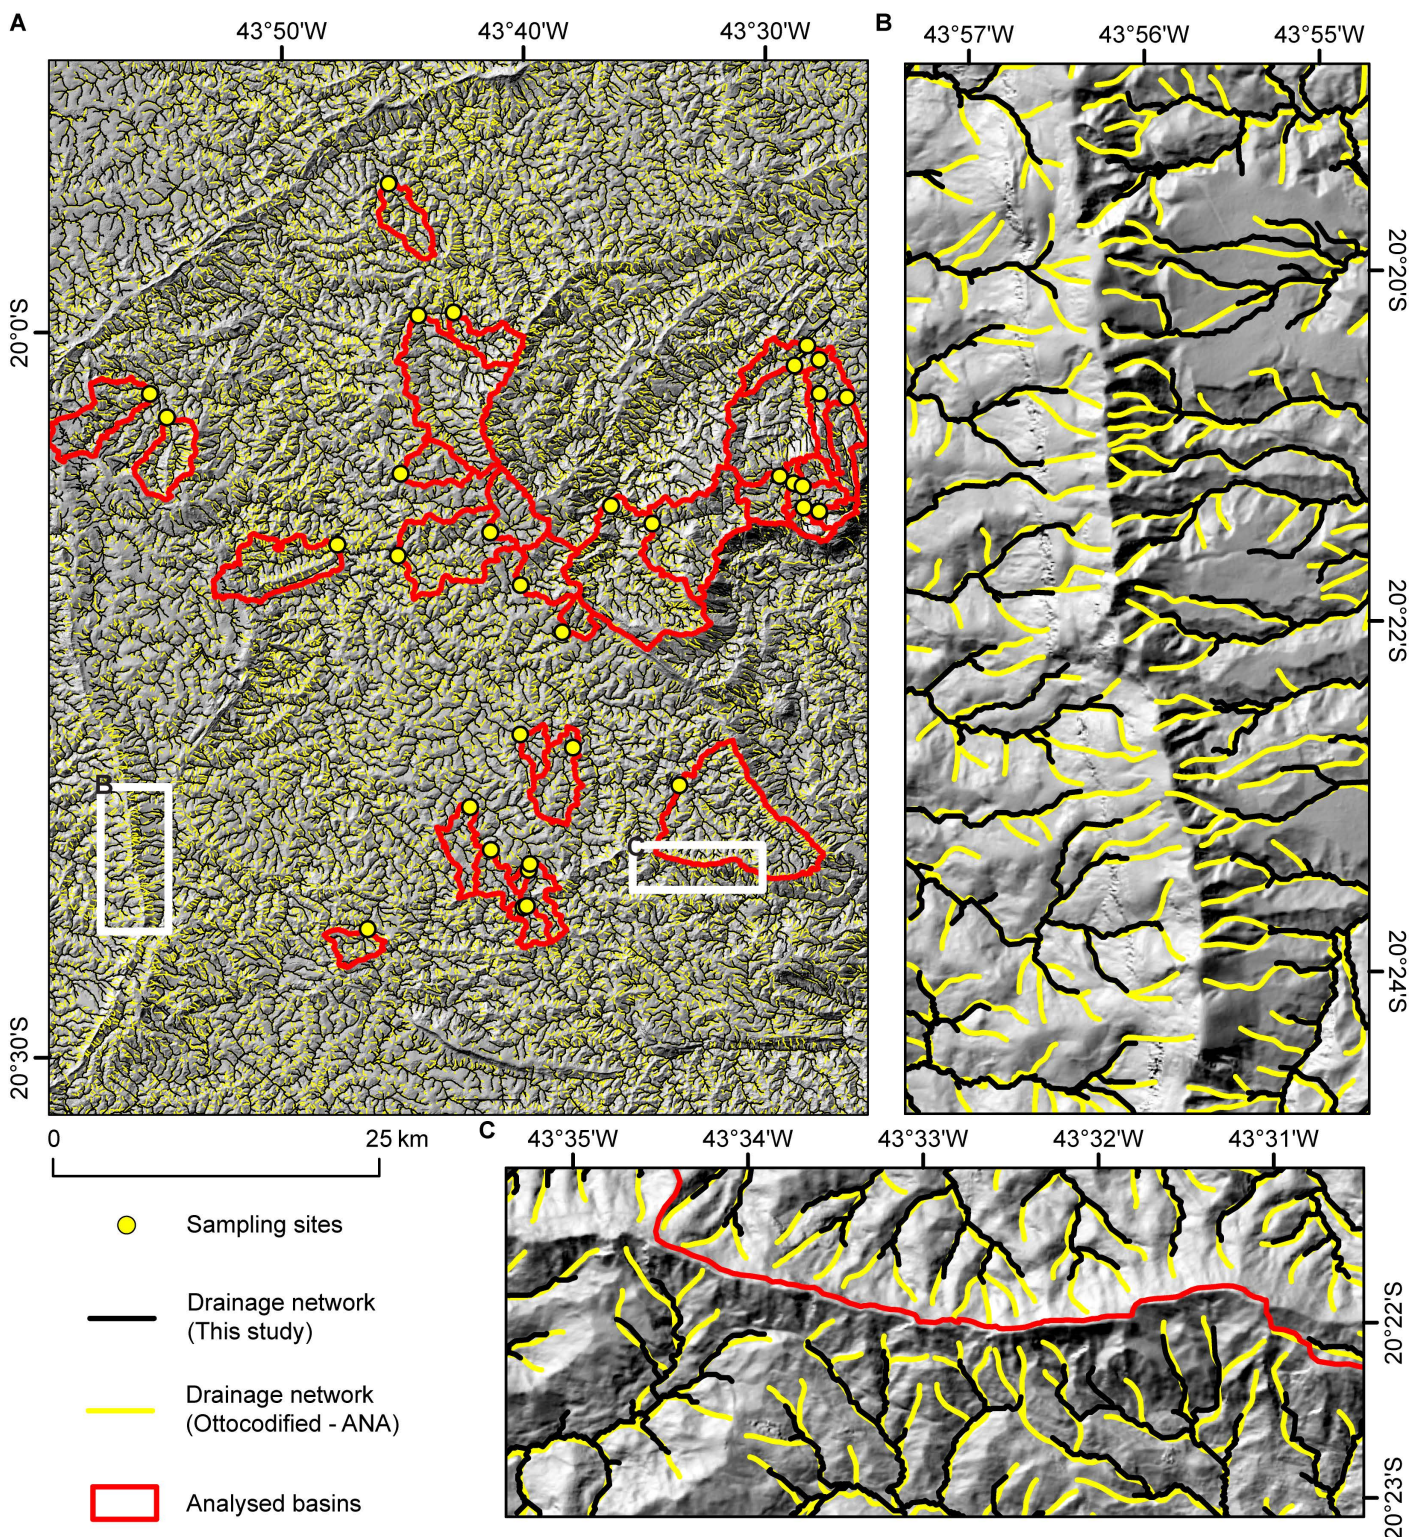

25 **Figure S2: Comparison between the drainage network used in this study and Brazil's National Water Agency (ANA) drainage network based on topographic maps developed using aerophotogrammetry.** Note that channel heads in our drainage network, extracted using an area threshold of 0.5 km<sup>2</sup>, are located, in all cases, downstream of where channel heads are situated in ANA's drainage network. Therefore, we interpret that we used a reasonable contributing area for extracting the drainage in the study area. Panels B and C were developed using a numerical scale of 1:80,000. Data source for ANA's drainage network: ANA (2017).



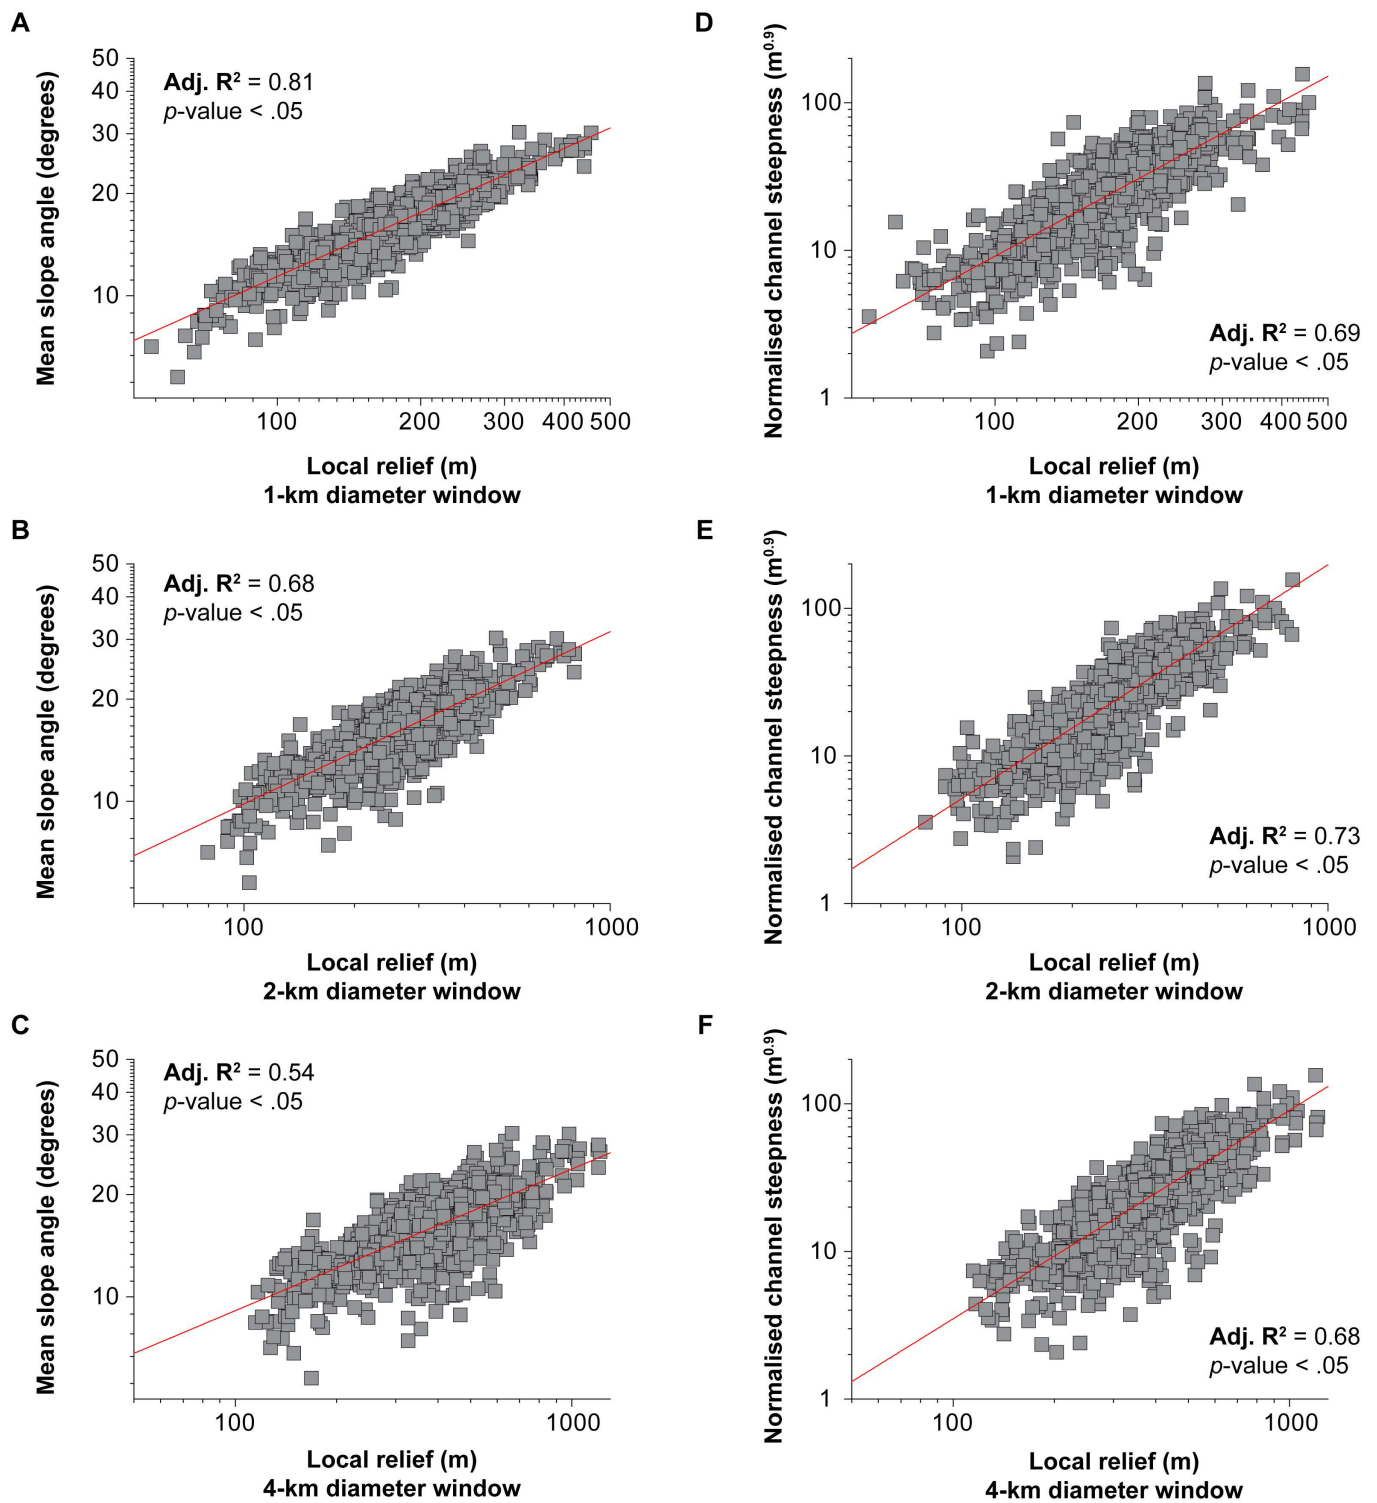

30 **Figure S3: Bivariate regressions between catchment-averaged mean slope angle and local relief (A, B, C), and catchment-averaged normalised channel steepness and local relief (D, E, F).** The diameter of the circular window used for the calculation of local relief is: (A, D) 1 km, (B, E) 2 km, (C, F) 4 km. Increasing the window diameter decreases the  $R^2$  of local relief against mean slope angle. In contrast, the 2-km diameter window local relief dataset exhibits the highest  $R^2$  with the normalised channel steepness (E); this is thus the window we used in the study. Grey circles represent every basin with order higher than 2nd-order for the QF ( $n = 3,155$ ).

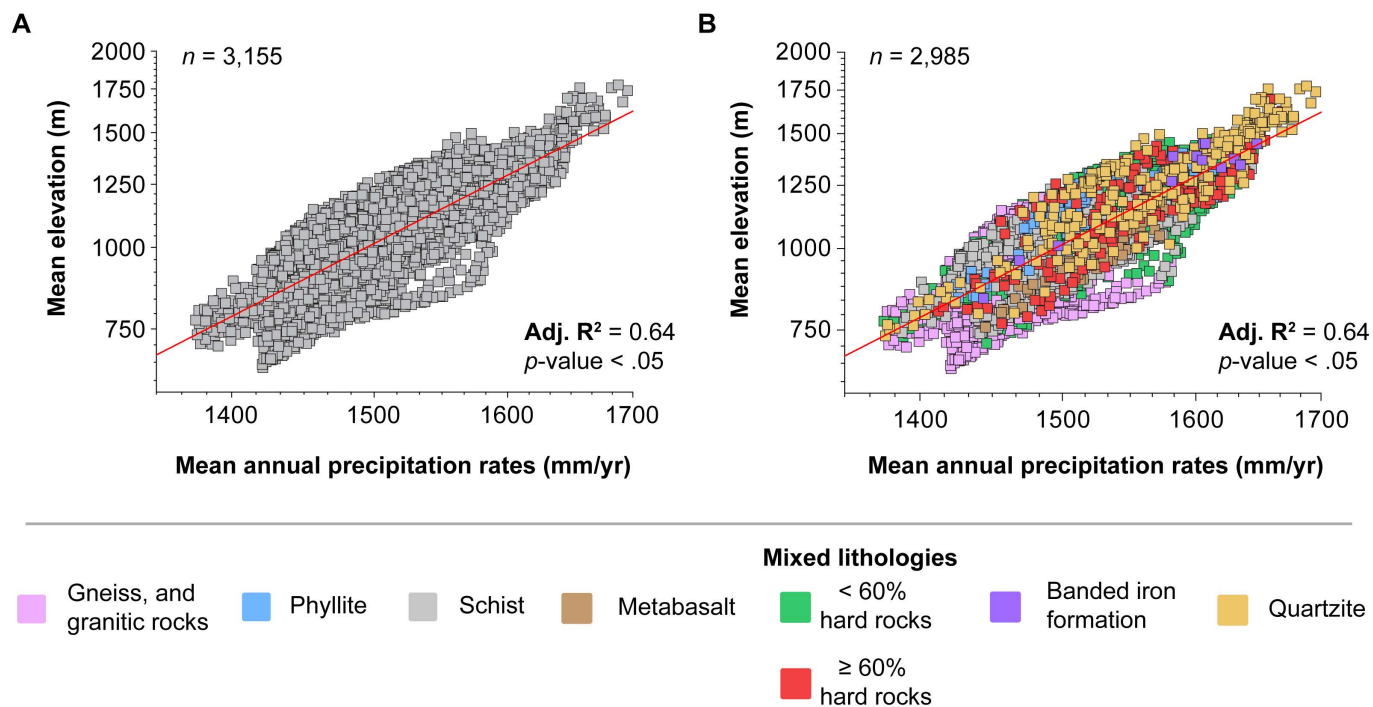

35 **Figure S4: Bivariate regressions between catchment-averaged elevation and mean annual precipitation rates.** Panel (A) represents all catchments in the study area with stream-order higher than second-order while panel (C) shows catchments underlain by main lithologies exposed in the study area. Mixed lithologies refer to catchments where a single rock-type does not account for  $\geq 75\%$  of the catchment area.

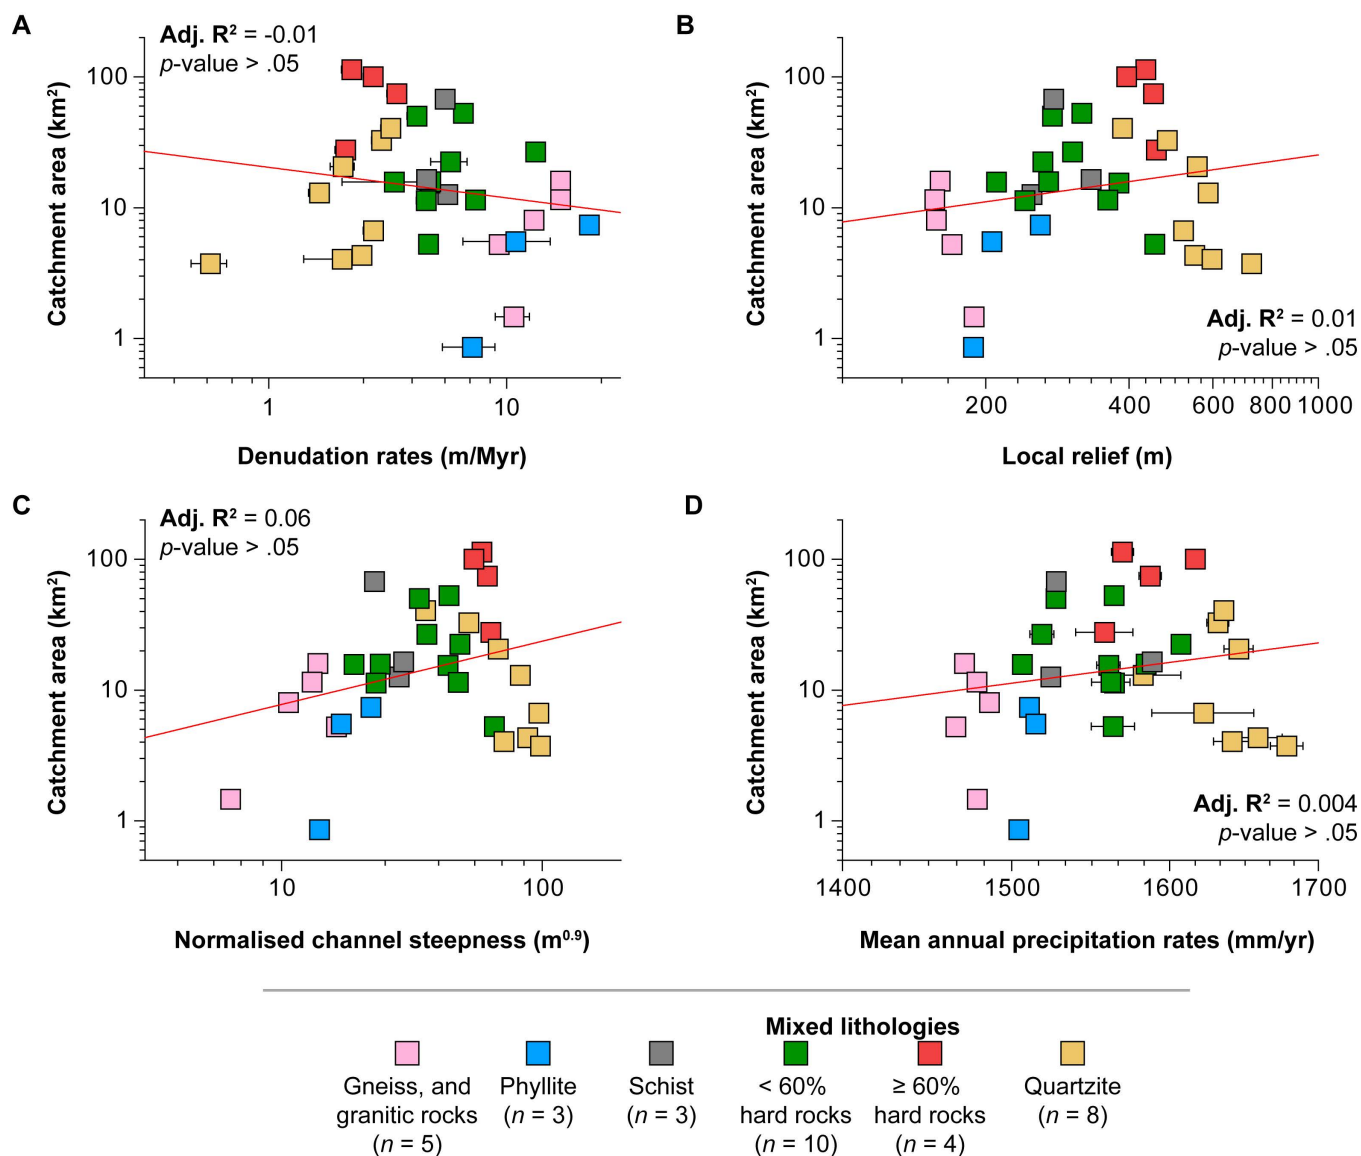

**Fig. S5: Log-linear correlations between basin area and denudation rates (panel A), and basin area and geomorphic parameters (panels B-D).** Note that none of the relationships between catchment area and geomorphic parameters is statistically significant at a .05 level. X-error bars represent external uncertainty in denudation rates in panel (A), and the standard error of the mean in panels (B), (C), and (D).

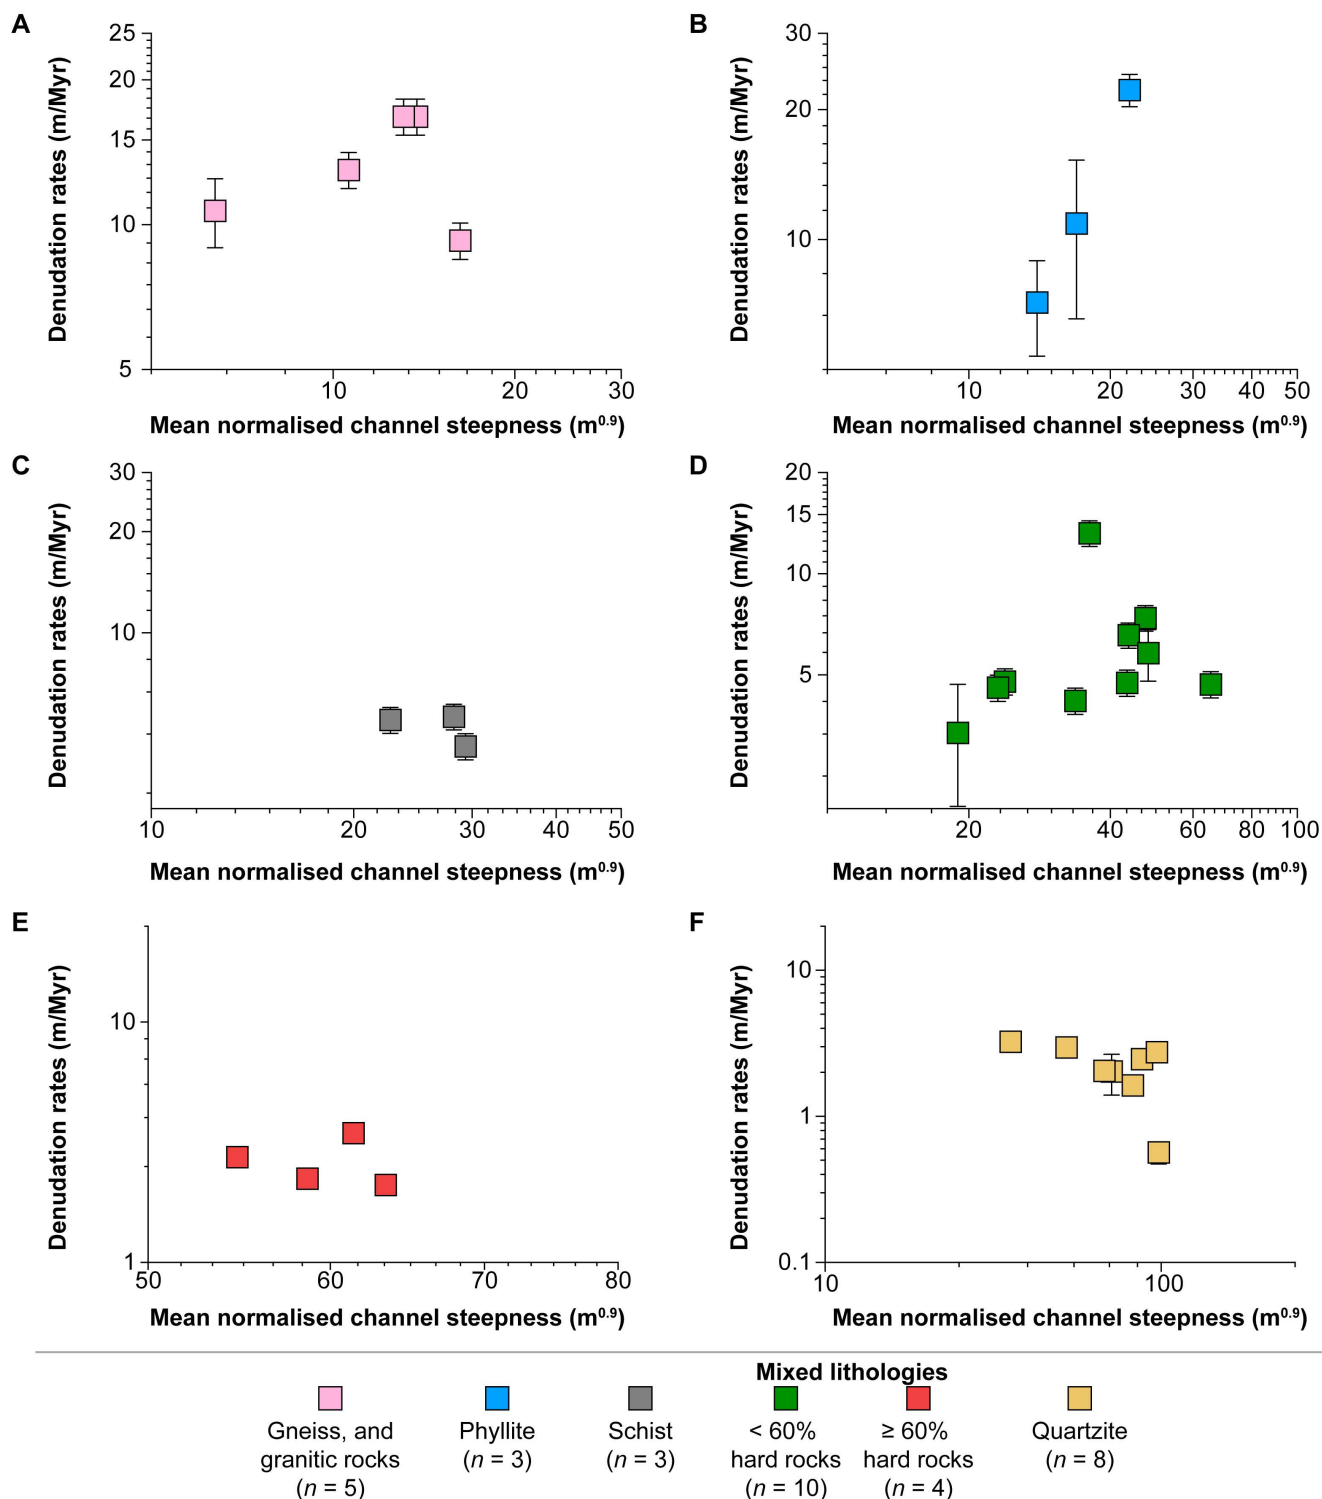

**Fig. S6: Variations in catchment-averaged denudation rates with mean normalised channel steepness for individual rock types.** Y-error bars show measurement uncertainties in the nuclide concentration as well as uncertainties related to the scaling method. Mixed lithology refers to catchments where a single lithology does not account for  $\geq 75\%$  of the catchment area.

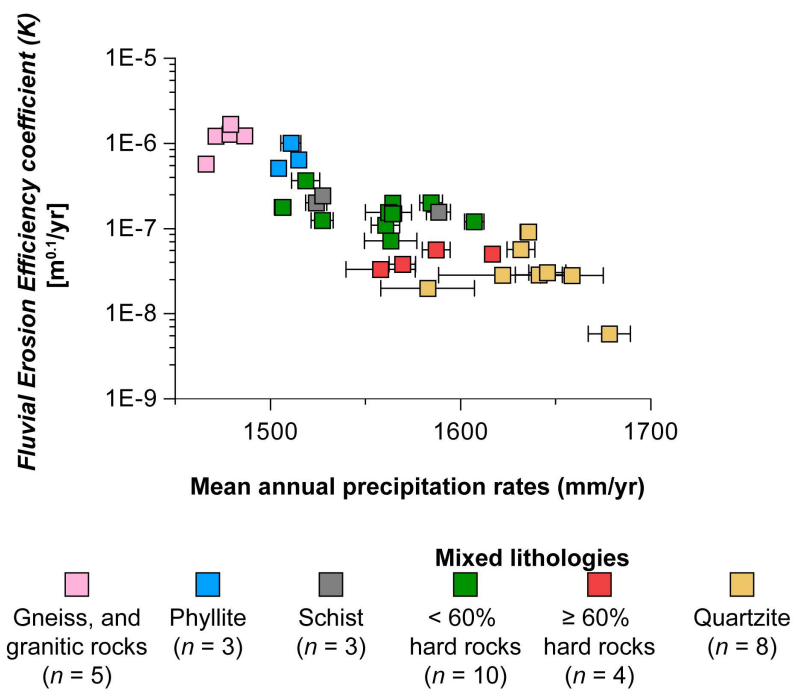

45 **Figure S7: Scatter plot between catchment-averaged fluvial erosion efficiency coefficient ( $K$ ) against mean annual precipitation rates.** Note that we assumed  $n = 1$ . X-error bars represent the standard error of the mean.



## References

- Agência Nacional de Águas (Brasil): Base Hidrográfica Ottocodificada da Bacia do Rio São Francisco, <https://metadados.ana.gov.br/geonetwork/srv/pt/metadata.show?id=438&currTab=distribution>, last access: 22 July 2020, 50 2017.
- Sant'Anna, L.G., Schorscher, H.D. and Riccomini, C.: Cenozoic tectonics of the Fonseca basin region, eastern Quadrilátero Ferrífero, MG, Brazil, J. S. Am. Earth Sci., 10, 275–284, [https://doi.org/10.1016/S0895-9811\(97\)00016-3](https://doi.org/10.1016/S0895-9811(97)00016-3), 1997.
